# Supplementary material
Source: PubMed Central journal article supplement (PMC2978806)

# S1

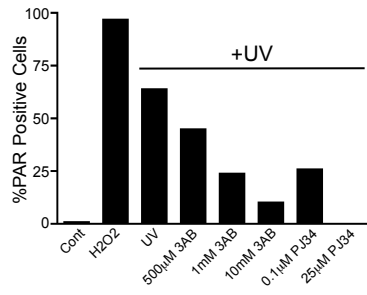

# S2

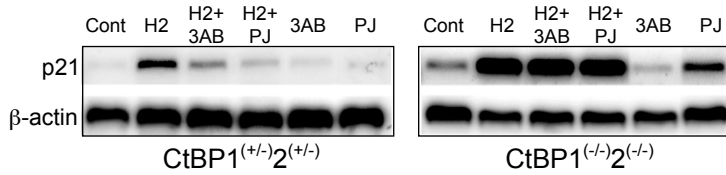

# S3

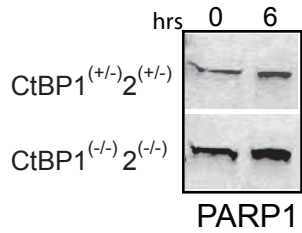

# S4

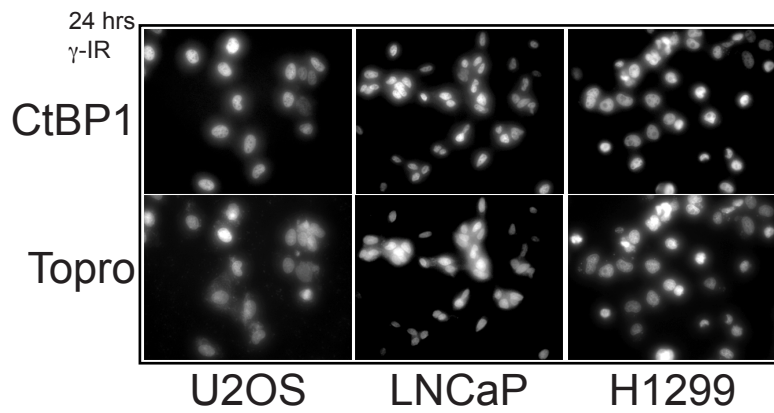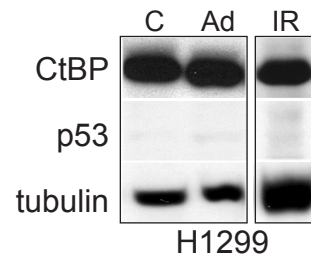

# S5

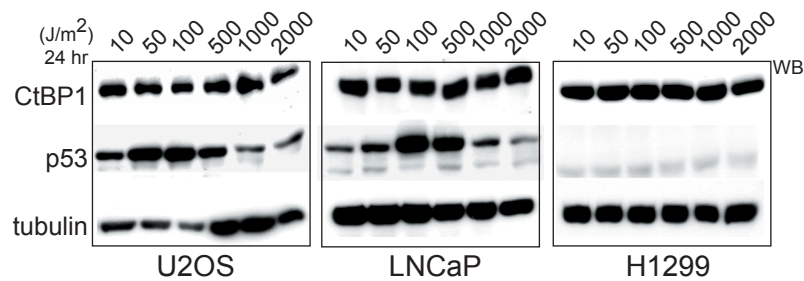

Supplement: NIHMS217274-supplement-1.pdf [file NIHMS217274-supplement-1.pdf]

# S6

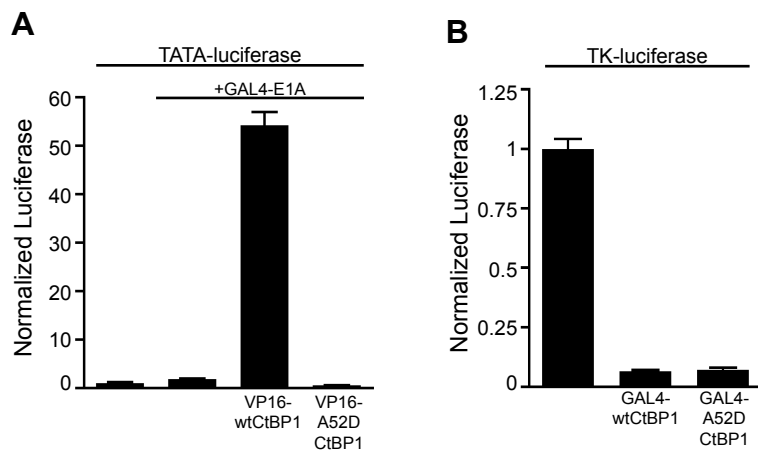

# S7

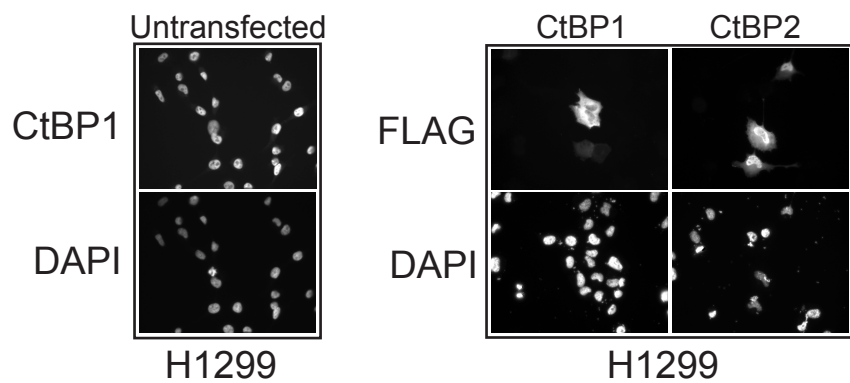

# S8

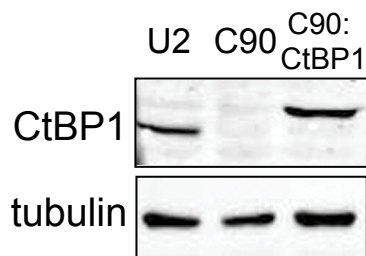

Supplement: NIHMS217274-supplement-2.pdf [file NIHMS217274-supplement-2.pdf]
